# Supplementary figures and images for: Development of indirect competitive ELISA and CLEIA for quantitative analysis of melatonin in health products
Source: Royal Society of Chemistry journal article supplement (doi:10.1039/d3ay01182h), 2023-01-01

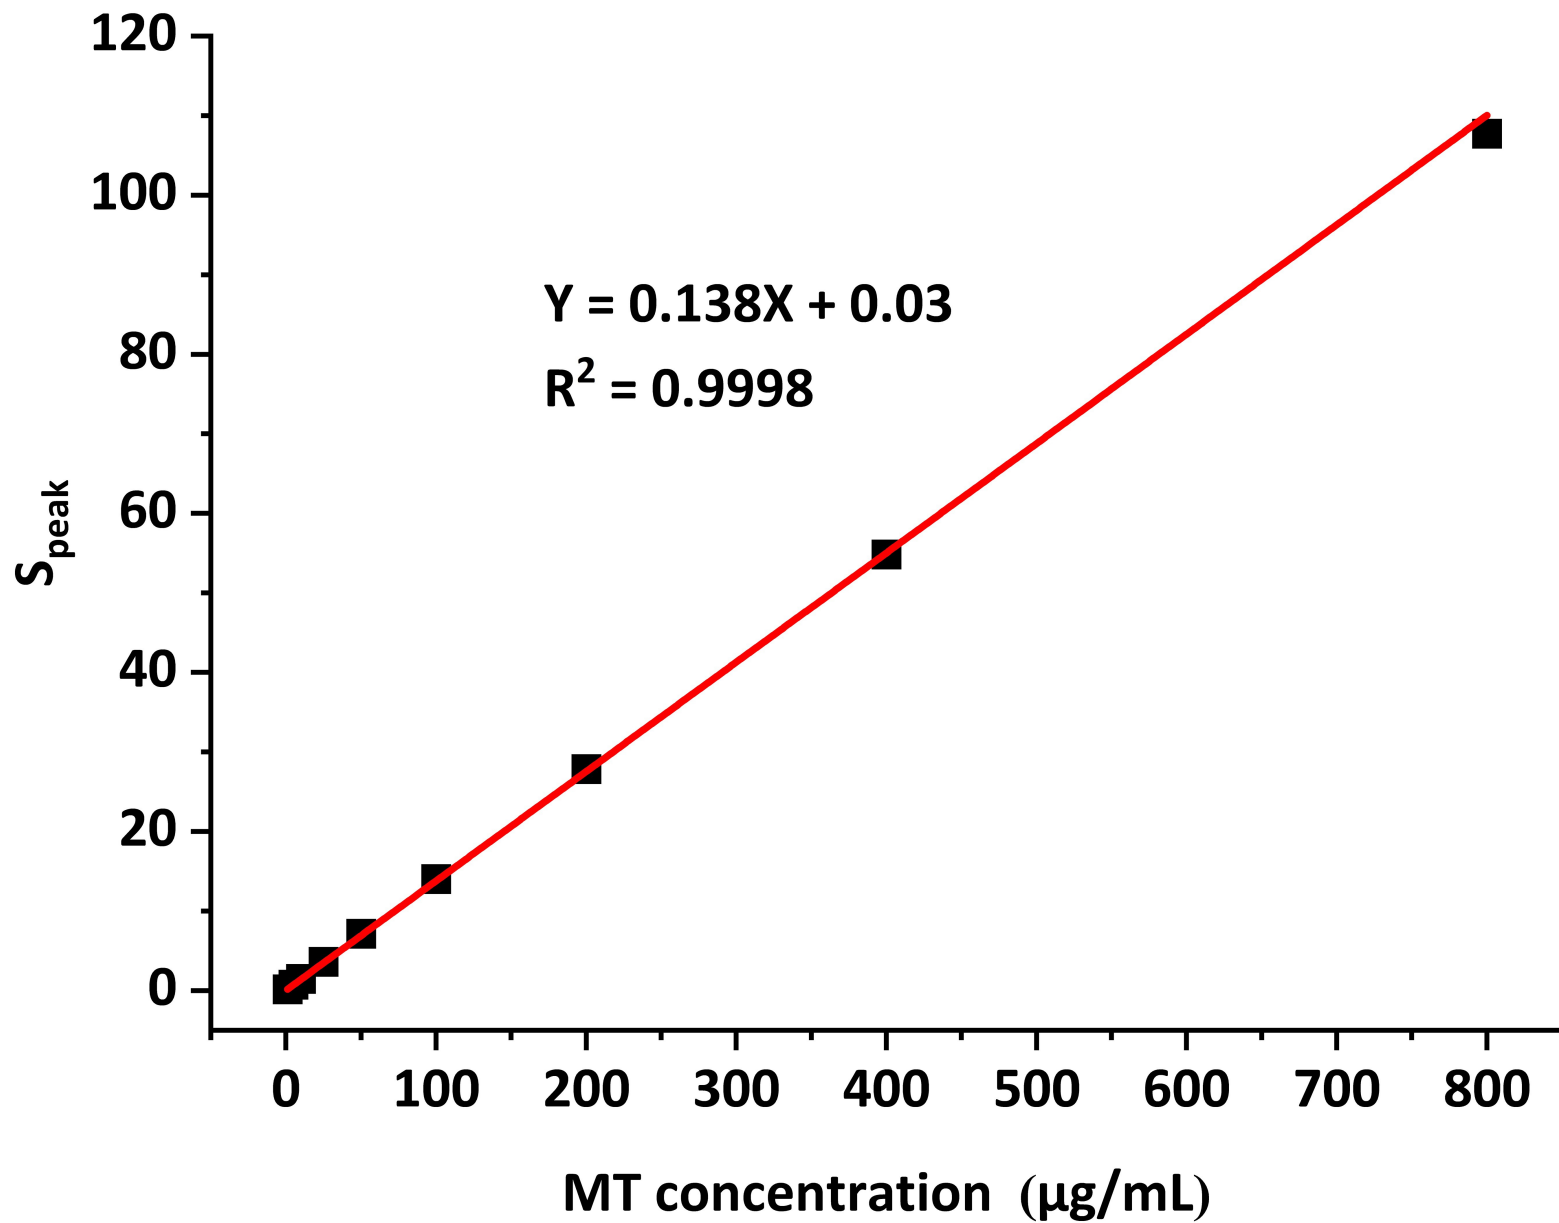

Supplement: d3ay01182h2.pdf [file d3ay01182h2.pdf]
